1 **Sensitivity of nasopharyngeal, oropharyngeal and nasal washes**  
2 **specimens for SARS-CoV-2 detection in the setting of sampling device shortage**

3 Calame Adrien<sup>\*,1,2,3</sup>, Mazza Léna<sup>\*,1,2,3</sup>, Renzoni Adriana<sup>1</sup>, Kaiser Laurent<sup>#,1,2,3</sup>, Schibler  
4 Manuel<sup>#,1,2</sup>

5 \*Calame Adrien and Mazza Léna contributed equally to this work.

6 # Kaiser Laurent and Schibler Manuel contributed equally to this work.

7

8 **Affiliations:**

- 9 1. Laboratory of Virology, Laboratory Medicine Division, Diagnostic Department,  
10 Geneva University Hospitals, Geneva, Switzerland  
11 2. Division of Infectious Disease, Geneva University Hospitals, Geneva, Switzerland  
12 3. Faculty of Medicine of Geneva, University of Geneva, Geneva, Switzerland  
13

14 Submitted to: European Journal of Clinical Microbiology & Infectious Diseases  
15

16 Running title: Alternative sampling methods for SARS-CoV-2 detection  
17

18 Keywords: SARS-CoV-2, diagnostic techniques, nasopharyngeal swab, nasal washes,  
19 oropharyngeal swab, upper respiratory tract infection  
20  
21

22 NOTE: This preprint reports new research that has not been certified by peer review and should not be used to guide clinical practice.

23 **Author contributions**

24 All authors contributed to the study conception and design. Material preparation and data  
25 collection were performed by Calame Adrien and Mazza Léna. Laboratory analyses were  
26 performed by Renzoni Adriana. Statistical analyses were performed by Calame Adrien. The  
27 first draft of the manuscript was written by Calame Adrien and Mazza Léna. The final version  
28 of the manuscript was written and corrected by Calame Adrien, Mazza Léna, Kaiser Laurent  
29 and Schibler Manuel. All authors read and approved the final manuscript.

30

31

32

33

34

35 *\*Corresponding author:*

36 Adrien Calame

37 Laboratory of Virology, Division of Infectious Diseases

38 Geneva University Hospitals

39 Rue Gabrielle-Perret-Gentil 4

40 1205 Geneva 14

41 Switzerland

42 Tel: ++41 22 372 40 96 ; fax: ++41 22 372 40 97

43 Email: [Adrien.calame@hcuge.ch](mailto:Adrien.calame@hcuge.ch)

44 **Abstract**

45 In the context of an unprecedented shortage of nasopharyngeal swabs (NPS) or sample  
46 transport media during the coronavirus disease 2019 (COVID-19) crisis, alternative methods  
47 for sample collection are needed. To address this need, we validated a cell culture medium as a  
48 viral transport medium, and compared the analytical sensitivity of SARS-CoV-2 real-time RT-  
49 PCR in nasal wash (NW), oropharyngeal swab (OPS) and NPS specimens. Both the clinical  
50 and analytical sensitivity were comparable in these three sample types. OPS and NW specimens  
51 may therefore represent suitable alternatives to NPS for SARS-CoV-2 detection.

52

53

54

55

56

57

58

59

60

61

62

63

64

65

66

67

68

## 69 **Introduction**

70 In the ongoing Coronavirus Disease 2019 (COVID-19) pandemic caused by severe acute  
71 respiratory syndrome coronavirus 2 (SARS-CoV-2), a broad testing strategy is crucial to  
72 identify infected persons, including less typical clinical presentations of the disease [1].  
73 However, during this pandemic, broad screening is sometimes hampered by equipment and  
74 reagent shortages occurring worldwide [2]. Affected items include sampling devices, as well  
75 as molecular testing reagents and viral transport medium.

76 The Human Coronaviruses (HCoVs) have been identified in a variety of specimens, including  
77 oropharyngeal, nasopharyngeal, nasal, sputum and bronchial fluid specimens [3, 5]. The  
78 detection of the sarbecovirus SARS-CoV-2, which causes COVID-19, by real-time reverse-  
79 transcription PCR (rRT-PCR) using a nasopharyngeal specimen is by now the most  
80 commonly accepted method and is recommended by the American CDC and others  
81 [<https://www.cdc.gov/coronavirus/2019-ncov/hcp/clinical-criteria.html>]. SARS-CoV-2 can also  
82 be found in oropharyngeal, sputum or even saliva specimens [6-10]. The WHO recommends  
83 collecting nasopharyngeal swabs (NPS), oropharyngeal swabs (OPS) or nasal wash (NW)  
84 specimens from ambulatory patients with COVID-19 disease  
85 [<https://apps.who.int/iris/handle/10665/331329?locale-attribute=fr&>].

86 In this crisis setting our institution, like many others, risked facing an unprecedented shortage  
87 of equipment, including NPS. We therefore tested several procedures in order to validate  
88 alternative solutions in house. OPS and NW are the two alternative procedures presented in  
89 this article. They are compared to the gold standard, the NPS. Finally, we validated the use of  
90 Dulbecco's Modified Eagle Medium (DMEM) as a transport medium for SARS-CoV-2  
91 specimens.

92

93

94 **Material and methods**

95 *Participants*

96 Eligible participants were  $\geq 18$  years old and hospitalized in the internal medicine wards at the  
97 Geneva University Hospitals, who had a positive SARS-CoV-2 rRT-PCR in a NPS specimen  
98 in the preceding one to six days. ICU patients were excluded.

99

100 *Oropharyngeal swabs sampling*

101 PCR tubes (Cobas™ Roche Reference No. 07976577001-3) were filled with 3ml of DMEM.  
102 Nylon flocked NPS (COPAN Reference No.A305CS01) and cotton OPS (VWR Reference  
103 No. 300260) were used for sampling. Consecutive OP and then NP samples from 29 patients  
104 were obtained in parallel and inserted into DMEM Cobas tubes. The OPS was always  
105 performed first. OPS specimens were obtained by swabbing the oropharyngeal posterior wall  
106 and turning once in each direction. They were then transferred into the Cobas PCR tube. NPS  
107 were performed according to the usual technique [4, 11]. Specimens were stored at 4°C after  
108 being collected.

109

110 *Nasal wash sampling*

111 PCR tubes (Cobas™ Roche Reference No. 07976577001-3) were filled with 1 ml of DMEM  
112 and 2ml of NaCl 0,9% was added in half of them. Consecutive NW and NPS specimens from  
113 20 volunteers were obtained. NW was always performed first, and as follows: 3 ml of sterile  
114 saline solution was injected into the nostril using a 3 ml syringe and recovered into a plastic  
115 cup by leaning patients' heads forward. Using the same syringe, a total 2 ml volume of the  
116 NW was transferred into a Cobas PCR tube containing 1 ml of DMEM media. NPS were  
117 performed according to the usual technique [4, 11]. They were then transferred into a Cobas

118 PCR tube containing 1ml of DMEM media and 2ml of NaCl 0,9% in order to compare the  
119 two techniques using equal media dilutions. Specimens were stored at 4°C after being  
120 collected.

121 *Video demonstrating the NW procedure available at:*

122 [https://www.youtube.com/watch?v=3cMoR7hSPF8&feature=emb\\_title](https://www.youtube.com/watch?v=3cMoR7hSPF8&feature=emb_title)

123

124 *SARS-CoV-2 RNA extraction and rRT-PCR*

125 Viral RNA genome detection was performed by real-time RT-PCR using the Roche Cobas  
126 6800 system (Cobas SARS-CoV-2 Ref 09175431190; Cobas SARS-CoV-2 Control kit Ref  
127 09175440190; Cobas 6800/8800 Buffer Negative Control kit Ref 07002238190). This  
128 technology allows nucleic acid extraction, purification, PCR amplification and detection of  
129 SARS-CoV-2, targeting ORF1a/b and a pan-Sarbecovirus conserved region of the E protein  
130 gene.

131

132 *Dulbecco's Modified Eagle Medium validation*

133 We assessed the suitability of the Dulbecco's Modified Eagle Medium (DMEM) for use in  
134 testing specimens by comparing it to the Universal Transport Medium (UTM). Ten positive  
135 NPS specimens were simultaneously spiked in 3ml DMEM and 3ml UTM and then analyzed  
136 by rRT-PCR using the Roche Cobas 6800 system.

137

138 *Statistical analyses*

139 The correlation between the Ct values for ORF1 (arbitrary chosen for comparison) in NPS  
140 and in OPS or in NW specimens was evaluated using the Pearson correlation coefficient ( $r$ ).  
141 The negative specimen by NW was arbitrarily assigned a Ct value of 45 and the two negative  
142 specimens by both OPS and NPS were excluded from the analysis. Correlation was also

143 represented graphically using a simple linear regression (*figures 1 and 2*). Statistical analyses  
144 were performed using IBM SPSS Statistics 25.

145

## 146 **Results**

### 147 *Dulbecco's Modified Eagle Medium validation*

148 The resulting cycle threshold (Ct) values were very similar when comparing the DMEM to  
149 the UTM. The delta Ct values ranged from 0.01 to 2.59 with a mean delta Ct value of 0.53 for  
150 ORF-1 and 0.67 for E-gene (*supplementary data, table 1*).

151

### 152 *Sampling methods comparison*

153 We compared the techniques in two groups of volunteers: the first group comprised 20 cases  
154 where a NW specimen was collected followed by a NPS specimen. The second group  
155 comprised 29 cases where an OPS specimen was collected followed by a NPS specimen. The  
156 clinical sensitivities of NW and OPS specimens were compared to those of the NPS  
157 specimens using the Ct values obtained by SARS-CoV-2 rRT-PCR (*supplementary data,*  
158 *table 2*). Out of 20 cases, one patient that was positive with the NPS sampling with Ct values  
159 of 33.46 for ORF1 and 35.12 for the E-protein gene had negative results with the NW  
160 sampling. When comparing the NW sampling to NPS sampling, the mean delta Ct values  
161 were 1.77 (range -6.82 to 7.06) and 1.73 (range -7.79 to 8.25) for ORF1 and E-protein gene  
162 respectively (*supplementary data, table 2*). The Pearson  $r$  was 0.75 ( $p < 0.01$ ), showing a  
163 statistically significant correlation between the ORF1 Ct values for the NPS and the NW  
164 specimens (*figure 1*).

165 Out of 29 patients, two cases were negatives in both the OPS and the NPS specimens. When  
166 comparing OPS to NPS sampling, the mean delta Ct values were 1.24 (range -4.24 to 5.8) and  
167 1.32 (range -4.63 to 7.6) for ORF1 and E-protein gene respectively (*supplementary data,*

168 *table 2*). The Pearson  $r$  was 0.88 ( $p < 0.01$ ), showing a statistically significant correlation  
169 between the ORF1 Ct values for the NPS and the OPS specimens (*figure 2*).

170

## 171 **Discussion**

172 Several studies have compared different types of upper respiratory tract specimens, and  
173 various collection methods have been compared to the gold standard method, the NPS [4, 11-  
174 13]. NW have also displayed promising upper respiratory virus detection rates [12, 14].  
175 Regarding the NW samples, based on our results the clinical sensitivity seemed comparable to  
176 that of NPS specimens. A single NW sample was rRT-PCR negative, whereas the NPS one  
177 collected consecutively from the same patient was positive. However the high Ct values of  
178 these samples suggest that the viral RNA present in both specimens from this volunteer was  
179 close to the limit of detection, and we cannot affirm that the clinical sensitivity of NW is  
180 below that of NPS specimens for SARS-CoV-2 RNA detection based on this single  
181 observation. On the quantitative level, the mean delta Ct values seemed acceptable and the  
182 correlation between NW and NPS was reinforced by the statistical analyses.

183 Our results also indicate a comparable clinical sensitivity between OPS and NPS at the  
184 qualitative level, since all patients with positive SARS-CoV-2 rRT-PCR results from NPS  
185 specimens, even those with high Ct values, also tested positive by OPS. Regarding the  
186 analytical sensitivity at the quantitative level, we obtained a significant correlation between  
187 OPS and NPS specimens.

188 Concerning the transport medium, our results suggest that the DMEM seems to be suitable for  
189 SARS-CoV-2 detection.

190 On the practical side, OPS and NW appeared to be better tolerated by patients, although this  
191 needs to be confirmed by using appropriate patient scoring. Another practical advantage of  
192 OPS over NPS in an equipment shortage setting is that adequate rigid swabs are much more



193 readily available than those used for NPS. Nasal washes present a valuable advantage as they  
194 can be performed without the need of specific swabs and with a minimal use of tools that are  
195 unlikely to be in shortage anyway. Moreover, both procedures seemed to cause less coughing  
196 than the NPS procedure, which represents a major advantage when considering the exposure  
197 of healthcare workers to SARS-CoV-2.

198 Limitations to our study include the relatively small sample size, and further evaluation would  
199 be needed to reach a definitive conclusion. The statistical analyses were also underpowered  
200 and should be interpreted with caution.

201 In conclusion, OPS and NW seem to be reliable alternative upper respiratory tract sampling  
202 methods for the molecular detection of SARS-CoV-2, and DMEM can be used as an  
203 alternative to commercial UTM, particularly in crisis settings. Further studies with a higher  
204 number of samples would still be needed to firmly conclude to an equivalence between these  
205 sampling methods. Nevertheless, the increased testing versatility offered by these substitutes  
206 should be greatly welcomed in the COVID-19 global crisis setting.

207

## 208 **Acknowledgments**

209 We would like to thank Benedikt Huttner for his help concerning statistical analyses, and Erik  
210 Boehm for his help in writing and correcting the manuscript.

211

## 212 **Compliance with Ethical Standards**

### 213 *Conflict of interest*

214 The authors declare that they have no conflict of interest.

215

216

217

218 *Research involving human participants*

219 According to the Swiss Ethics Committees on Research Involving Humans standards, this  
220 study took place in the context of a method quality validation in an emergency setting, and  
221 therefore did not require any authorization by our ethic committee.

222

223 *Consent to participate*

224 Oral informed consent was obtained from all individual participants included in the study.

225

226

227

228

229

230

231

232

233

234

235

236

237

238

239

240

241

242

## 243 **References**

244

245 1. Vetter P, Vu DL, L'Huillier AG, Schibler M, Kaiser L, Jacquieroz F. Clinical features  
246 of covid-19. *BMJ*. 2020 Apr 17;369:m1470.

247 2. Vermeiren C, Marchand-Senécal X, Sheldrake E, Bulir D, Smieja M, Chong S, et al.  
248 Comparison of Copan Eswab and FLOQswab for COVID-19 PCR diagnosis: working around  
249 a supply shortage. *J Clin Microbiol*. 2020 Apr 15;

250 3. Charlton CL, Babady E, Ginocchio CC, Hatchette TF, Jerris RC, Li Y, et al. Practical  
251 Guidance for Clinical Microbiology Laboratories: Viruses Causing Acute Respiratory Tract  
252 Infections. *Clin Microbiol Rev*. 2019;32(1).

253 4. Ek P, Böttiger B, Dahlman D, Hansen KB, Nyman M, Nilsson AC. A combination of  
254 naso- and oropharyngeal swabs improves the diagnostic yield of respiratory viruses in adult  
255 emergency department patients. *Infect Dis (Lond)*. 2019;51(4):241–8.

256 5. Falsey AR, Formica MA, Walsh EE. Simple method for combining sputum and nasal  
257 samples for virus detection by reverse transcriptase PCR. *J Clin Microbiol*. 2012  
258 Aug;50(8):2835.

259 6. Wang W, Xu Y, Gao R, Lu R, Han K, Wu G, et al. Detection of SARS-CoV-2 in  
260 Different Types of Clinical Specimens. *JAMA*. 2020 Mar 11;

261 7. Pan Y, Zhang D, Yang P, Poon LLM, Wang Q. Viral load of SARS-CoV-2 in clinical  
262 samples. *Lancet Infect Dis*. 2020;20(4):411–2.

263 8. Won J, Lee S, Park M, Kim TY, Park MG, Choi BY, et al. Development of a  
264 Laboratory-safe and Low-cost Detection Protocol for SARS-CoV-2 of the Coronavirus  
265 Disease 2019 (COVID-19). *Exp Neurobiol*. 2020 Mar 11;

266 9. Loeffelholz MJ, Tang Y-W. Laboratory diagnosis of emerging human coronavirus  
267 infections - the state of the art. *Emerg Microbes Infect*. 2020 Dec;9(1):747–56.

268 10. Williams E, Bond K, Zhang B, Putland M, Williamson DA. Saliva as a non-invasive  
269 specimen for detection of SARS-CoV-2. *Journal of Clinical Microbiology* [Internet]. 2020  
270 Apr 21 [cited 2020 Apr 27]; Available from:  
271 <https://jcm.asm.org/content/early/2020/04/17/JCM.00776-20>

272 11. Hernes SS, Quarsten H, Hagen E, Lyngroth AL, Pripp AH, Bjorvatn B, et al.  
273 Swabbing for respiratory viral infections in older patients: a comparison of rayon and nylon  
274 flocked swabs. *Eur J Clin Microbiol Infect Dis*. 2011 Feb;30(2):159–65.

275 12. Lieberman D, Lieberman D, Shimoni A, Keren-Naus A, Steinberg R, Shemer-Avni Y.  
276 Identification of respiratory viruses in adults: nasopharyngeal versus oropharyngeal sampling.  
277 *J Clin Microbiol*. 2009 Nov;47(11):3439–43.

278 13. Li L, Chen Q-Y, Li Y-Y, Wang Y-F, Yang Z-F, Zhong N-S. Comparison among  
279 nasopharyngeal swab, nasal wash, and oropharyngeal swab for respiratory virus detection in  
280 adults with acute pharyngitis. *BMC Infect Dis*. 2013 Jun 20;13:281.

281 14. Spyridaki IS, Christodoulou I, de Beer L, Hovland V, Kurowski M, Olszewska-Ziaber  
282 A, et al. Comparison of four nasal sampling methods for the detection of viral pathogens by  
283 RT-PCR-A GA(2)LEN project. *J Virol Methods*. 2009 Mar;156(1–2):102–6.

284

## Figures

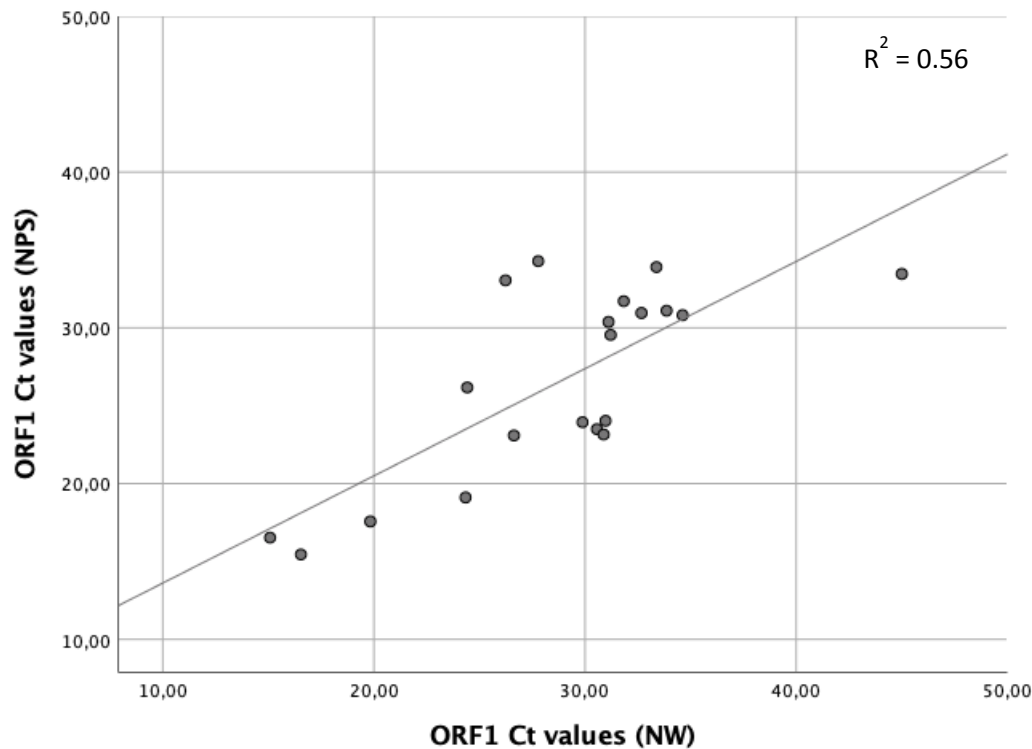

**Figure 1. Correlation between rRT-PCR Cycle threshold (Ct) values obtained with nasal washes (NW) and with nasopharyngeal swabs (NPS).**

Each dot represents one of the 20 patients who had a NW and a NPS. One negative specimen by NW was arbitrary fixed at a Ct value of 45. The trend line is estimated by a simple linear regression, and the correlation coefficient  $R^2$  (square of the Pearson  $r$  value) is represented on the top right corner.

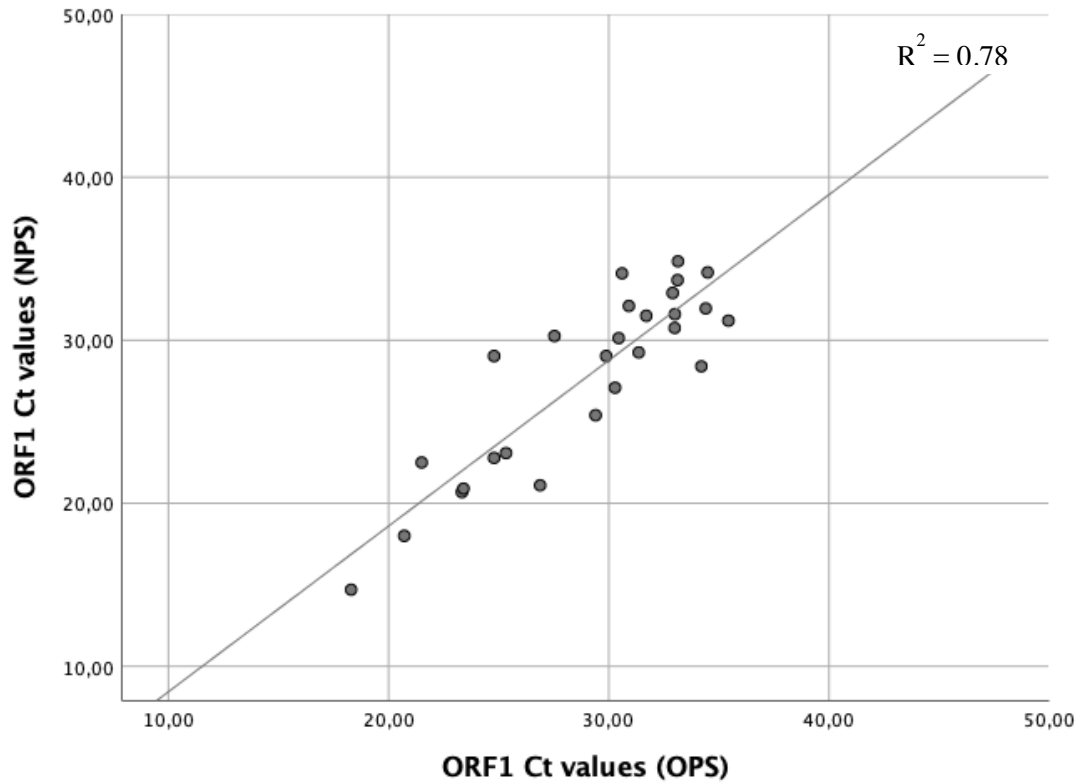

**Figure 2. Correlation between rRT-PCR Cycle threshold (Ct) values obtained with oropharyngeal swabs (OPS) and with nasopharyngeal swabs (NPS).**

Each dot represents one of the 27 patients who had positive OPS and NPS. The trend line is estimated by a simple linear regression, and the correlation coefficient  $R^2$  (square of the Pearson  $r$  value) is represented on the top right corner.

## Supplementary data: tables

| Patient  | DMEM  |        | UTM   |        | $\Delta$ Ct values |             |
|----------|-------|--------|-------|--------|--------------------|-------------|
|          | ORF 1 | E-gene | ORF 1 | E-gene | ORF 1              | E-gene      |
| <b>a</b> | ND    | ND     | 36.43 | ND     | <b>NA</b>          | <b>NA</b>   |
| <b>b</b> | 28.8  | 29.39  | 29.03 | 30.08  | <b>0.23</b>        | <b>0.69</b> |
| <b>c</b> | ND    | ND     | ND    | ND     | <b>NA</b>          | <b>NA</b>   |
| <b>d</b> | 31.17 | 32.55  | 28.89 | 29.96  | <b>2.81</b>        | <b>2.59</b> |
| <b>e</b> | ND    | 37.81  | 36.3  | 37.82  | <b>NA</b>          | <b>0.01</b> |
| <b>f</b> | 24.95 | 25.43  | 25.01 | 25.11  | <b>0.06</b>        | <b>0.32</b> |
| <b>g</b> | 20.87 | 21.6   | 20.84 | 20.94  | <b>0.03</b>        | <b>0.66</b> |
| <b>h</b> | 32.22 | 33.64  | 31.81 | 32.73  | <b>0.41</b>        | <b>0.91</b> |
| <b>i</b> | 28.8  | 29.51  | 28.9  | 29.41  | <b>0.1</b>         | <b>0.1</b>  |
| <b>j</b> | 29.25 | 30.14  | 29.17 | 30.04  | <b>0.08</b>        | <b>0.1</b>  |

### Supplementary table 1. Comparison of DMEM and UTM media.

The delta Ct value for target ORF 1 between the two transport media containing the same specimen ranged between 0.01 and 2.59. One specimen turned out negative in both media. Two specimens were very close to the detection limit and yielded undetectable results for one or more targets (patient a: ND/ND and 36.43/ND, patient e: ND/37.81 and 36.3/37.82). ND: not detected. NA: not applicable.

| a.                   | NP swab + 1ml DMEM + 2ml NaCl |               | 2ml NASAL WASH + 1ml DMEM |               | delta CT        |           |
|----------------------|-------------------------------|---------------|---------------------------|---------------|-----------------|-----------|
|                      | patients                      | ORF1 Ct value | E-gene Ct value           | ORF1 Ct value | E-gene Ct value | ORF1      |
| 1                    | 23.5                          | 23.9          | 30.56                     | 31.21         | 7.06            | 7.31      |
| 2                    | 34.28                         | 35.33         | 27.78                     | 28.67         | -6.5            | -6.66     |
| 3                    | 23.15                         | 23.63         | 30.88                     | 31.88         | 7.73            | 8.25      |
| 4                    | 30.95                         | 32.84         | 32.67                     | 33.95         | 1.72            | 1.11      |
| 5                    | 24.03                         | 24.06         | 30.97                     | 31.51         | 6.94            | 7.45      |
| 6                    | 23.94                         | 24.32         | 29.88                     | 30.93         | 5.94            | 6.61      |
| 7                    | 30.38                         | 31.44         | 31.11                     | 31.71         | 0.73            | 0.27      |
| 8                    | 19.11                         | 19.43         | 24.34                     | 24.65         | 5.23            | 5.22      |
| 9                    | 29.54                         | 30.64         | 31.21                     | 32.34         | 1.67            | 1.7       |
| 10                   | 15.45                         | 15.71         | 16.54                     | 16.64         | 1.09            | 0.93      |
| 11                   | 31.1                          | 32.28         | 33.86                     | 35.5          | 2.76            | 3.22      |
| 12                   | 31.71                         | 33.79         | 31.83                     | 32.8          | 0.12            | -0.99     |
| 13                   | 33.05                         | 34.48         | 26.23                     | 26.69         | -6.82           | -7.79     |
| 14                   | 16.53                         | 16.69         | 15.08                     | 15.32         | -1.45           | -1.37     |
| 15                   | 33.46                         | 35.12         | NEG                       | NEG           | NA              | NA        |
| 16                   | 26.17                         | 26.71         | 24.42                     | 24.47         | -1.75           | -2.24     |
| 17                   | 17.57                         | 18.01         | 19.83                     | 20.12         | 2.26            | 2.11      |
| 18                   | 23.09                         | 23.9          | 26.63                     | 28.32         | 3.54            | 4.42      |
| 19                   | 30.81                         | 32.7          | 34.62                     | 37.18         | 3.81            | 4.48      |
| 20                   | 33.9                          | 35.96         | 33.38                     | 34.81         | -0.52           | -1.15     |
| <b>Mean delta CT</b> |                               |               |                           |               | 1.7663157       | 1.7305263 |
|                      |                               |               |                           |               | 9               | 2         |
| b.                   | NP swab + 3ml DMEM            |               | OP swab + 3ml DMEM        |               | Delta Ct values |           |
|                      | patients                      | ORF1 Ct value | E-gene Ct value           | ORF1 Ct value | E-gene Ct value | ORF1      |
| 21                   | NEG                           | NEG           | NEG                       | NEG           | NA              | NA        |
| 22                   | 28.4                          | 29            | 34.2                      | 36.6          | 5.8             | 7.6       |
| 23                   | 21.1                          | 22            | 26.88                     | 27.67         | 5.78            | 5.67      |
| 24                   | 31.2                          | 32.47         | 35.43                     | 37.83         | 4.23            | 5.36      |
| 25                   | 25.4                          | 26.3          | 29.4                      | 30.3          | 4               | 4         |
| 26                   | 14.7                          | 15.8          | 18.3                      | 18.7          | 3.6             | 2.9       |
| 27                   | 27.09                         | 27.5          | 30.28                     | 30.73         | 3.19            | 3.23      |
| 28                   | 18                            | 18.38         | 20.71                     | 21.14         | 2.71            | 2.76      |
| 29                   | 20.69                         | 21.34         | 23.33                     | 23.56         | 2.64            | 2.22      |
| 30                   | 20.9                          | 21.6          | 23.4                      | 23.9          | 2.5             | 2.3       |
| 31                   | 31.95                         | 34.17         | 34.4                      | 36.9          | 2.45            | 2.73      |
| 32                   | 23.08                         | 23.61         | 25.33                     | 25.72         | 2.25            | 2.11      |
| 33                   | 30.75                         | 32            | 32.99                     | 33.85         | 2.24            | 1.85      |
| 34                   | 29.25                         | 30.13         | 31.36                     | 32.62         | 2.11            | 2.49      |
| 35                   | 22.78                         | 23.45         | 24.79                     | 25.24         | 2.01            | 1.79      |
| 36                   | 31.6                          | 32.5          | 33                        | 34            | 1.4             | 1.5       |
| 37                   | 29.03                         | 29.97         | 29.88                     | 30.69         | 0.85            | 0.72      |
| 38                   | 34.16                         | 36.8          | 34.49                     | 35.96         | 0.33            | -0.84     |



|                   |       |       |       |       |           |           |
|-------------------|-------|-------|-------|-------|-----------|-----------|
| 39                | 30.13 | 31.57 | 30.45 | 31.28 | 0.32      | -0.29     |
| 40                | 31.5  | 34    | 31.7  | 33.6  | 0.2       | -0.4      |
| 41                | 32.9  | 35.1  | 32.9  | 34.8  | 0         | -0.3      |
| 42                | 33.69 | 36.5  | 33.12 | 34.43 | -0.57     | -2.07     |
| 43                | 22.5  | 23.00 | 21.5  | 22.30 | -1        | -0.7      |
| 44                | 32.1  | 33.56 | 30.91 | 32.96 | -1.19     | -0.6      |
| 45                | 30.26 | 31.01 | 27.53 | 28.13 | -2.73     | -2.88     |
| 46                | 34.1  | 36.6  | 30.6  | 32.3  | -3.5      | -4.3      |
| 47                | 29.03 | 30.05 | 24.79 | 25.42 | -4.24     | -4.63     |
| 48                | NEG   | NEG   | NEG   | NEG   | NA        | NA        |
| 49                | 34.84 | 36.83 | 33.14 | 35.2  | -1.7      | -1.63     |
| <b>Mean delta</b> |       |       |       |       | 1.2474074 | 1.1329629 |
| <b>CT</b>         |       |       |       |       | 1         | 6         |

**Table 2. Sampling methods comparison.**

**a.** Ct values of NP swab specimens compared to Ct values of NW specimens by RT-PCR in 20 patients. The mean delta Ct value shows a slightly better overall sensitivity with NP swabs (average 1.7). Patient 15's NW sample was negative despite a positive NP specimen.

**b.** Ct values of NP swab specimens compared to Ct Values of OP swab specimens in RT-PCR in 29 patients. Patients 1 and 28 were negative both in NP and OP swabs. The mean delta Ct value shows a slightly overall better sensitivity with NP swabs (average 1.2-1.3). The specimen collection was done at the same time.
